# Supplementary material for: A cheap and straightforward method for the selective isolation of histidine-derived natural products using nickel(ii) phosphate
Source: Royal Society of Chemistry journal article supplement (doi:10.1039/d4ay01467g), 2024-01-01
Supplement: d4ay01467g1.pdf [file d4ay01467g1.pdf]

## *Supporting Information*

An inexpensive and straightforward method for the selective isolation of histidine-derived natural products using nickel (II) phosphate

Muhammad Saalim,<sup>†</sup> Lu Ya,<sup>†</sup> Kenneth J. Woycechowsky,<sup>†‡</sup> and Benjamin R. Clark<sup>†,\*</sup>

<sup>†</sup>School of Pharmaceutical Science and Technology, Tianjin University, 92 Weijin Road, Tianjin 300092, People's Republic of China

<sup>‡</sup> Current Address: School of Molecular Sciences, Arizona State University, Tempe, AZ, USA

## Table of Contents

|                                                                         |    |
|-------------------------------------------------------------------------|----|
| Isolation of gartryprostatin C and meleagrin using conventional methods | S3 |
| <b>Figure S1:</b> $^1\text{H}$ NMR of meleagrin in MeOD                 | S5 |
| <b>Figure S2:</b> $^1\text{H}$ NMR of gartryprostatin C in DMSO         | S5 |
| Estimation of $\text{Ni}^+$ concentration                               | S6 |
| <b>Figure S3:</b> Calibration curve for $\text{Ni}^{2+}$                | S6 |
| References                                                              | S6 |

## **Isolation of gartryprostatin C and meleagrins using conventional methods**

Gyprostatin C and meleagrins were isolated from two different fungi using conventional methods i.e., large-scale culture in steamed rice followed by solvent extraction, fractionation, and purification with preparative HPLC. Meleagrins were isolated from a strain of *Penicillium chrysogenum* WX-6 collected from Caldara di Manziana Nature Reserve, Rome, Italy (GeneBank accession number: PP087909) whereas gartryprostatin C was isolated from a strain of *Aspergillus sclerotiorum* L3, a lab strain found originally as contamination in our lab (GeneBank accession number: PP087906). Structures were confirmed by matching spectroscopic (NMR and HRMS) data with the literature.<sup>1-3</sup>

### **Large-scale culture and extraction of *Aspergillus sclerotiorum* L3**

*Aspergillus sclerotiorum* L3 was cultured on steamed (autoclaved) rice medium by inoculating steamed rice in 1 L conical flask using fungal discs of fungi cultured on PDA plates. After 14 days, the biomass was extracted with methanol and methanol crude extract was dispersed in water and extracted with ethyl acetate using separating funnel.

### **Isolation of gartryprostatin C from crude extract**

The ethyl acetate crude extract from large scale culture of *Aspergillus sclerotiorum* L3 (300 mg) was subjected to fractionation with Sephadex LH-20 column using methanol with a flow rate of 0.8 ml/min. Gartryprostatin C was obtained in fraction 8 (5.4 mg). The fraction was then purified by preparative HPLC using isocratic conditions i.e., 50% ACN, flowrate = 8 ml/min to obtain 2.5 mg of gartryprostatin C at 26 mins.

**Data for gartryprostatin C:** <sup>1</sup>H-NMR (400 MHz, DMSO-*d*<sub>6</sub>)  $\delta$  12.25 (s), 11.85 (s), 8.14 (s), 7.81 (s), 6.68 (s), 6.08 (dd, *J* = 17.7 Hz, 10.9 Hz), 5.07 (d, *J* = 10.52 Hz), 5.02 (d, *J* = 17.83 Hz), 4.01 (s), 1.41 (s); <sup>13</sup>C-NMR (100 MHz, DMSO-*d*<sub>6</sub>)  $\delta$  162.9, 158.8, 145.7, 136.3, 134.3, 131.7, 124.1, 111.8, 103.4, 44.7, 37.4, 27.9; HRESIMS *m/z* 259.1197 [M - H]<sup>-</sup> (calculated for C<sub>13</sub>H<sub>15</sub>N<sub>4</sub>O<sub>2</sub>, 259.1200).

## Large-scale culture and extraction of *Penicillium chrysogenum* WX-6

*Penicillium chrysogenum* WX-6 was cultured on steamed (autoclaved) rice medium with pH adjusted to 3 with citric acid prior to autoclaving. After two weeks the biomass was extracted with methanol. The methanol crude extract was dispersed in water and extracted with ethyl acetate using separating funnel.

## Isolation of meleagrins from crude extract

The ethyl acetate extract (8 g) was subjected to fractionation with HP-20 resin by first washing with water followed by gradient elution with methanol. The 40% methanol fraction (569 mg) was first separated by preparative HPLC using gradient conditions i.e., 18-48% ACN to give various flow fractions with a flow rate of 8 ml/min. Flow fraction P22 (94 mg) was further separated using isocratic conditions (20% ACN) to give meleagrins at 27 mins (10 mg).

**Data for meleagrins:**  $^1\text{H-NMR}$  (400 MHz, methanol- $d_4$ )  $\delta$  8.29 (s), 7.79 (s), 7.59 (d,  $J = 7.8$  Hz), 7.27 (t,  $J = 7.6$  Hz), 7.06 (t,  $J = 7.6$  Hz), 6.99 (d,  $J = 8.0$  Hz), 6.10 (brs), 5.38 (s), 5.05 (m), 3.74 (s), 1.31 (s), 1.29 (s);  $^{13}\text{C-NMR}$  (100 MHz, methanol- $d_4$ )  $\delta$  167.0, 160.8, 148.1, 144.3, 141.8, 138.0, 133.0, 129.4, 127.4, 126.0, 125.9, 124.5, 112.9, 113.7, 109.1, 108.0, 103.2, 35.6, 54.0, 43.5, 24.3; HRESIMS  $m/z$  434.1823  $[\text{M} + \text{H}]^+$  (calculated for  $\text{C}_{23}\text{H}_{24}\text{N}_5\text{O}_4$ , 434.1833).

## $^1\text{H-NMR}$ of Meleagrins and Gartryprostatin C isolated using $\text{Ni}_3(\text{PO}_4)_2$

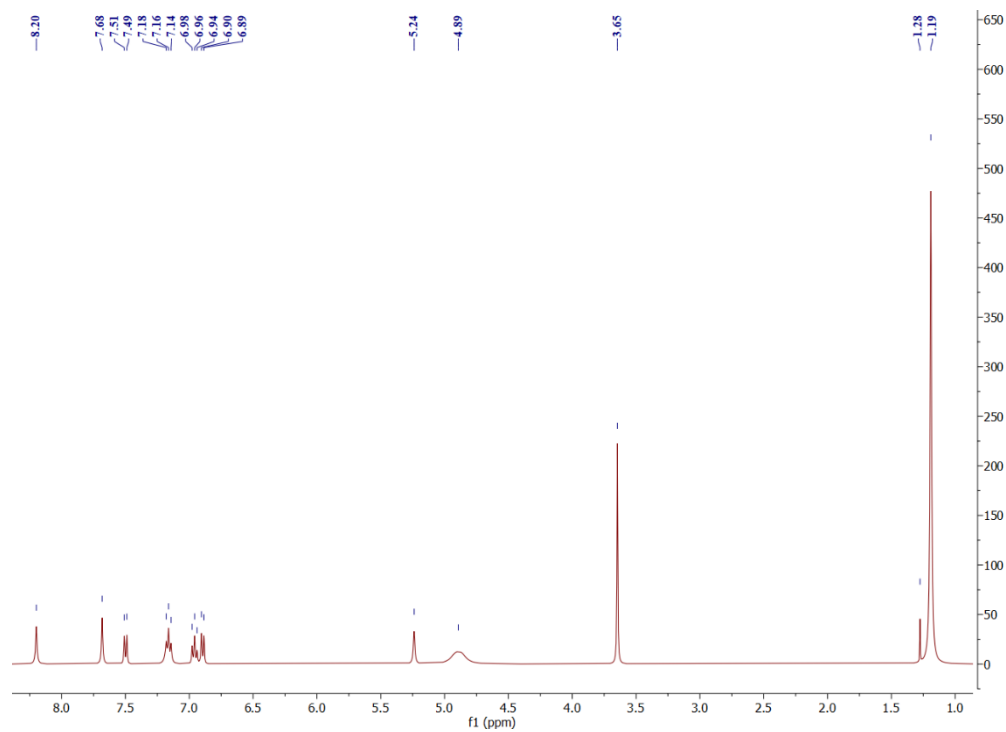

**Figure S1.**  $^1\text{H-NMR}$  (400 MHz,  $d_4\text{-MeOH}$ ) of meleagrins isolated using  $\text{Ni}_3(\text{PO}_4)_2$

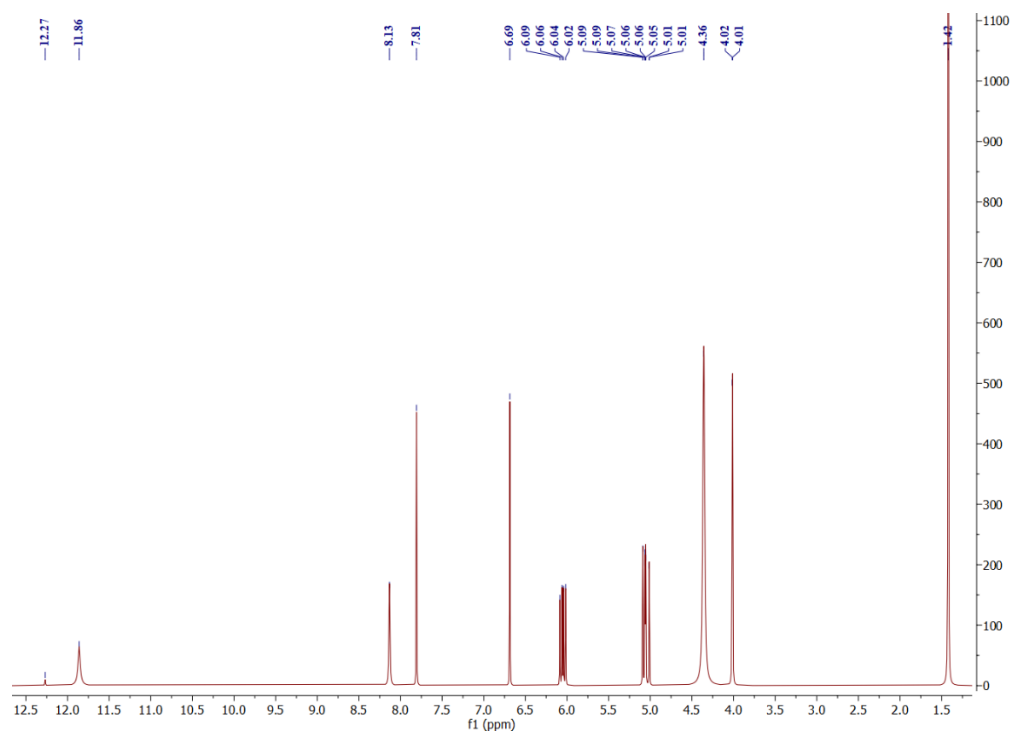

**Figure S2.**  $^1\text{H-NMR}$  (400 MHz,  $d_6\text{-DMSO}$ ) of gartryprostatin C isolated using  $\text{Ni}_3(\text{PO}_4)_2$ .

### Estimation of Ni<sup>2+</sup> concentration

Ni<sup>2+</sup> concentrations were estimated using a colorimetric method. A standard curve (Figure S1) was constructed using serial twofold dilutions of a soluble nickel (II) salt (NiSO<sub>4</sub>·6H<sub>2</sub>O), measuring absorbance at 750 nm, where other components are unlikely to absorb. The elution fraction from meleagrins had an absorbance of 0.0298, corresponding to a concentration of 17.0 mM.

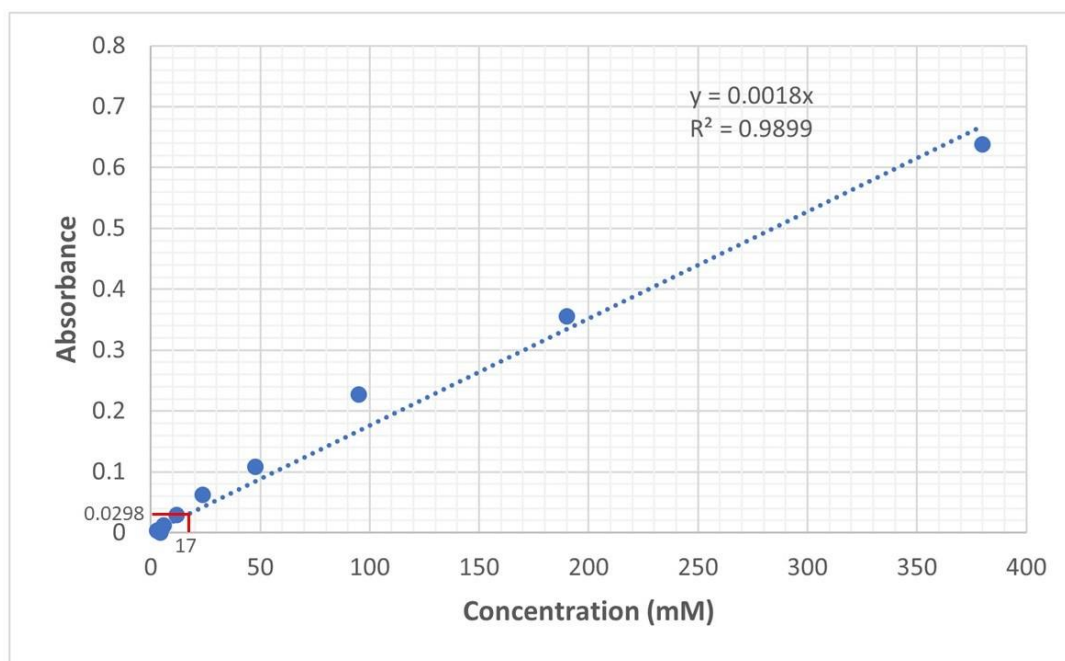

**Figure S3.** Calibration curve for Ni<sup>2+</sup> (Absorbance at 750 nm). Nickel concentration in the meleagrins eluent is marked in red on the curve.

### REFERENCES

- (1) W. He, Y. Xu, P. Fu, M. Zuo, W. Liu, Y. Jiang, L. Wang, W. Zhu, *J. Agric. Food Chem.* **2019**, *67*, 10660-10666.
- (2) J. Wang, W. He, X. Qin, X. Wei, X. Tian, L. Liao, S. Liao, B. Yang, Z. Tu, B. Chen, *RSC Adv.* **2015**, *5*, 68736-68742.
- (3) Zheng, C. J.; Sohn, M.-J.; Lee, S.; Kim, W.-G. *PloS one* **2013**, *8*, e78922.
